# Supplementary material
Source: publisher site journal article supplement (https://thieme-connect.com/media/10.1055-s-00035024/201701/supmat/10-1160-th16-06-0466-supp.pdf)
Supplement: Supplementary file 1 [file 10-1160-th16-06-0466-supp.pdf]

Supplementary Material to Vorlova, Koch et al. “Coagulation factor XII induces pro-inflammatory cytokine responses in macrophages and promotes atherosclerosis in mice”

(Thromb Haemost 2017; 117.1)

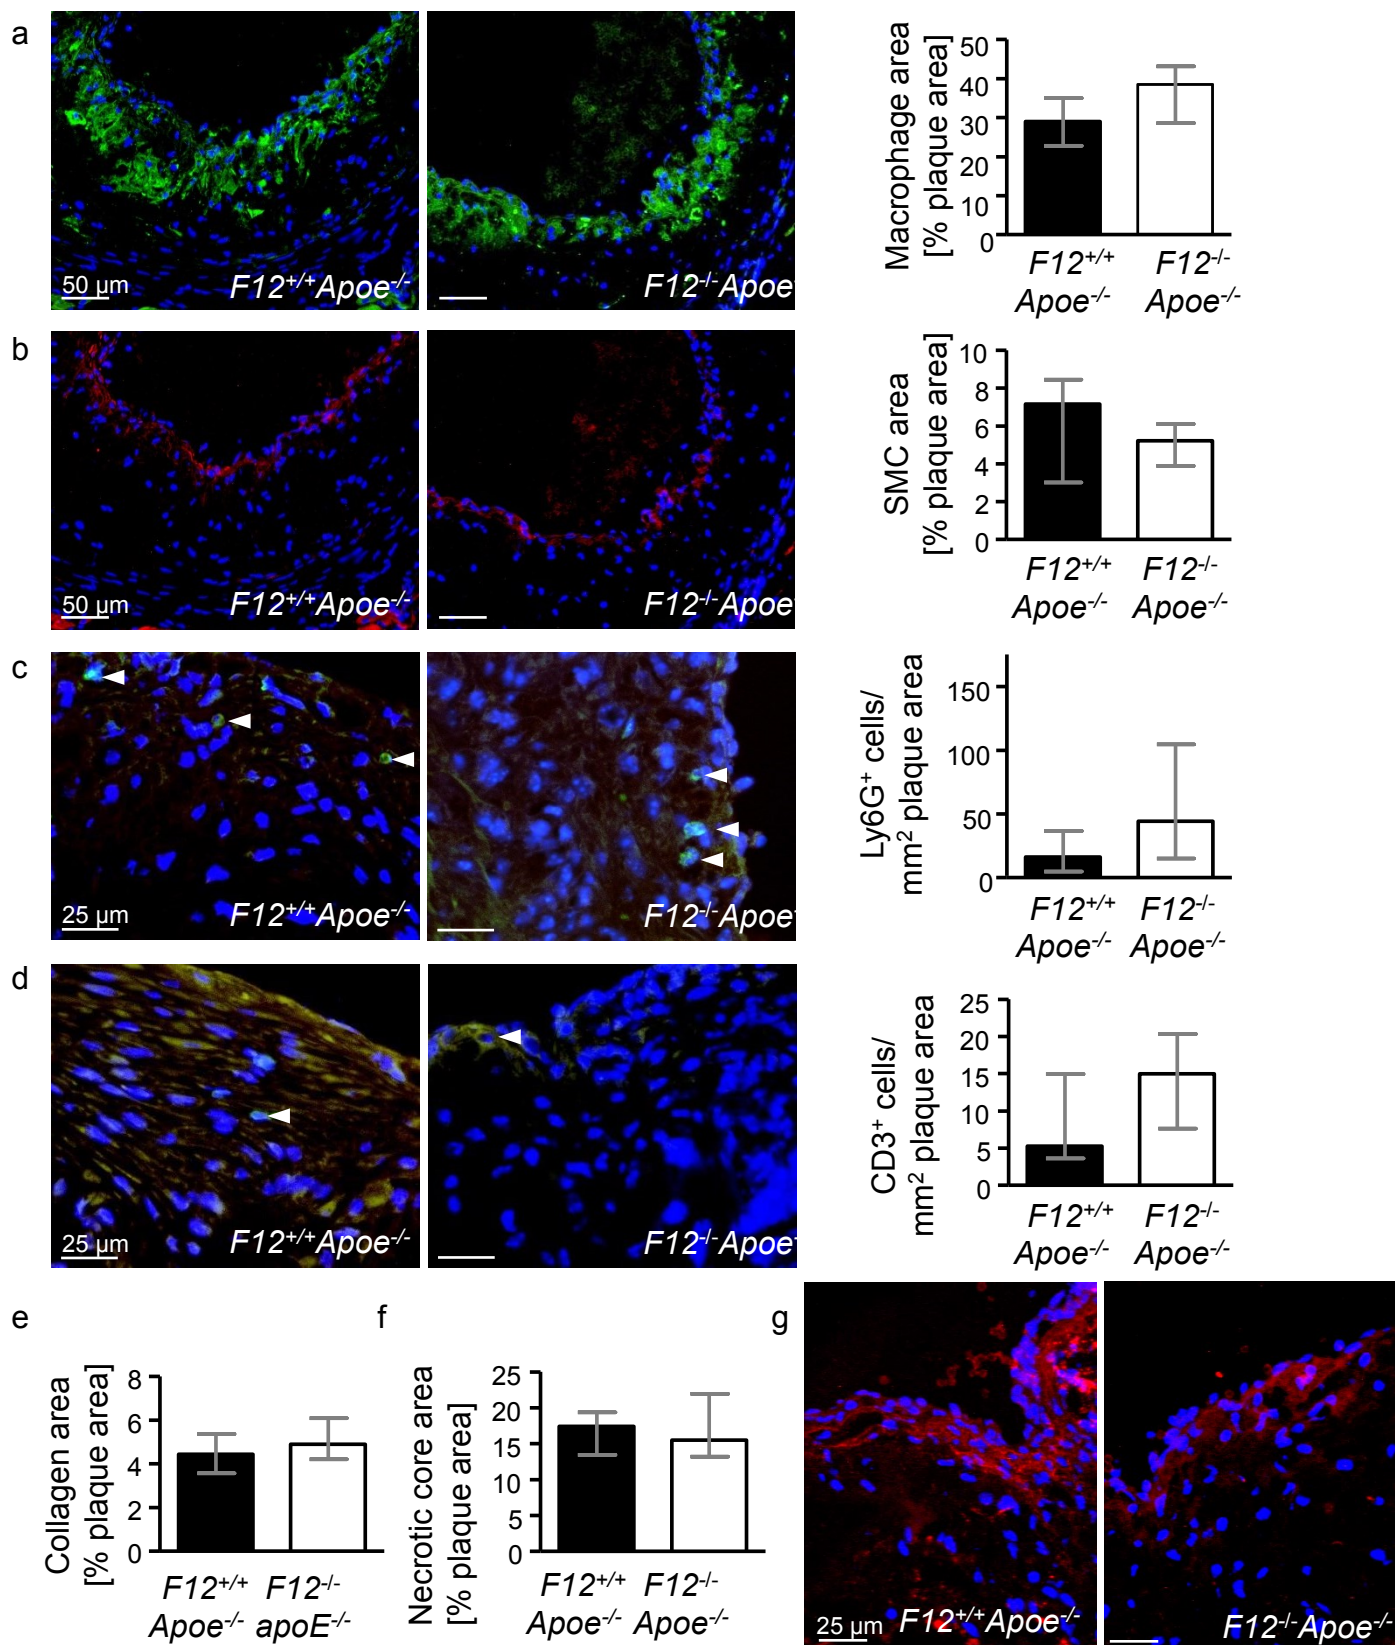

**Suppl. Figure 1: Deficiency of FXII in *ApoE<sup>-/-</sup>* mice does not alter atherosclerotic plaque phenotype.** Atherosclerotic lesions were analyzed in *F12<sup>+/+</sup>apoE<sup>-/-</sup>* (n=13 mice) and *F12<sup>-/-</sup>apoE<sup>-/-</sup>* (n=14 mice) mice fed a high fat diet for 12 weeks. (a) Quantification of the Mac-2<sup>+</sup> (green) macrophage area, (b)  $\alpha$ -smooth muscle actin<sup>+</sup> (red) smooth muscle cell area, (c) Ly6G<sup>+</sup> (green) neutrophil numbers, (d) CD3<sup>+</sup> (green) T cell numbers, (d) Sirius-red<sup>+</sup> collagen area, (e) acellular necrotic core area, and (g) MMP9 (red) staining in aortic root sections. Representative images are shown; nuclei are counterstained with DAPI (blue). Bars represent median with interquartile ranges.

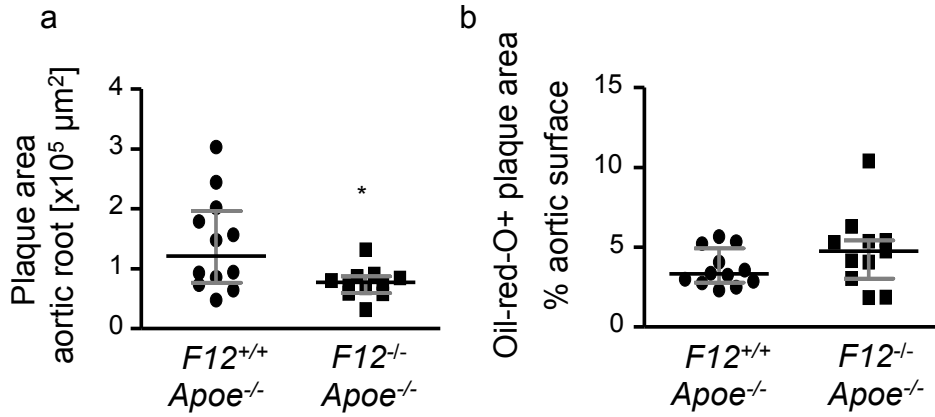

**Suppl. Figure 2: Deficiency of FXII in  $Apoe^{-/-}$  mice reduces atherosclerotic lesion formation in the aortic root but not aorta after 6 weeks of HFD.** Atherosclerotic lesion formation was analyzed in  $F12^{+/+} Apoe^{-/-}$  (n=12) and  $F12^{-/-} Apoe^{-/-}$  (n=11) mice fed a high fat diet for 6 weeks. (a) Quantification of plaque area in Aldehyde-Fuchsin stained aortic root sections and (b) in Oil-Red-O stained aortae. Data represent median with interquartile ranges.

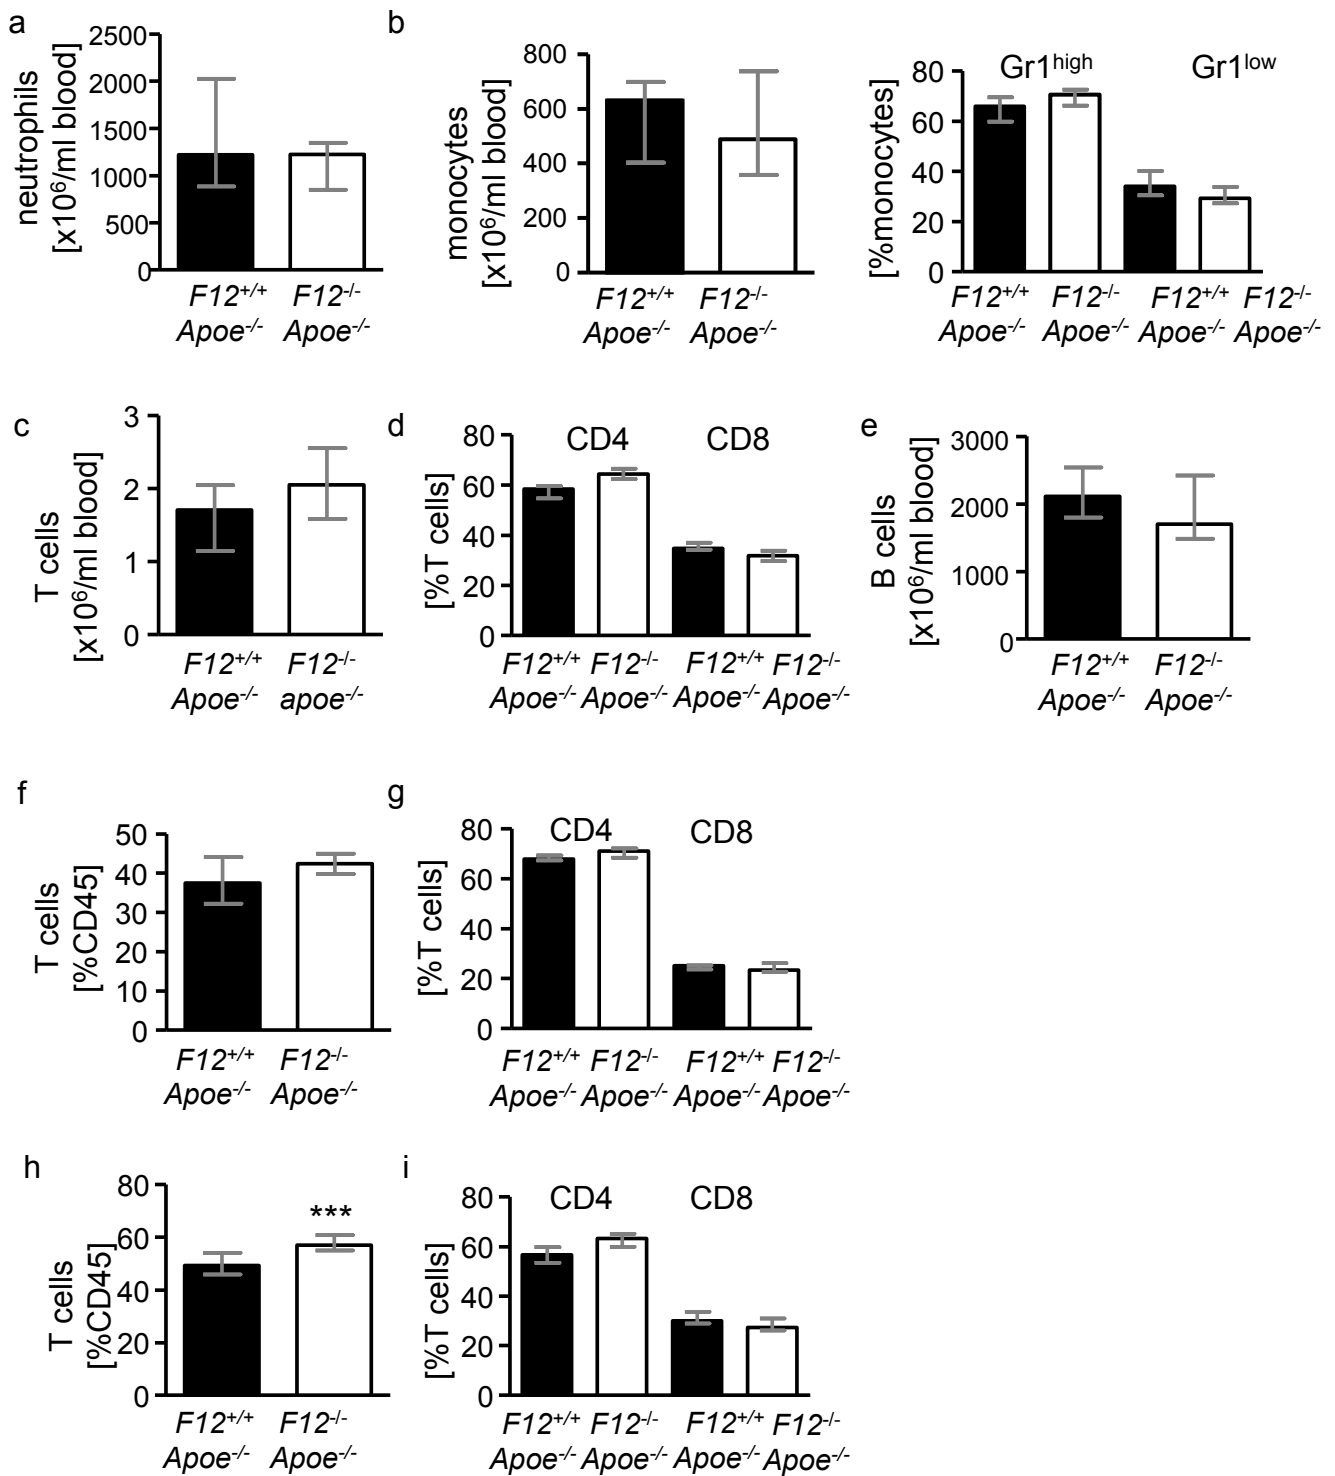

**Suppl. Figure 3: Leukocyte distributions in  $F12^{+/+}Apoe^{-/-}$  and  $F12^{-/-}Apoe^{-/-}$  mice.** Flow cytometric analyses of neutrophil (a), monocyte and monocyte subsets (b), T cells (c) and CD4<sup>+</sup> and CD8<sup>+</sup> T cell distributions, and B cells (d) in blood, and T cell distributions in spleen (f,g) and lymph nodes (h,i) of atherosclerotic  $F12^{+/+}Apoe^{-/-}$  (n=10) and  $F12^{-/-}Apoe^{-/-}$  mice (n=6) fed a high fat diet for 12 weeks. Bars represent median with interquartile ranges. \*\*p<0.01, \*\*\*p<0.001.

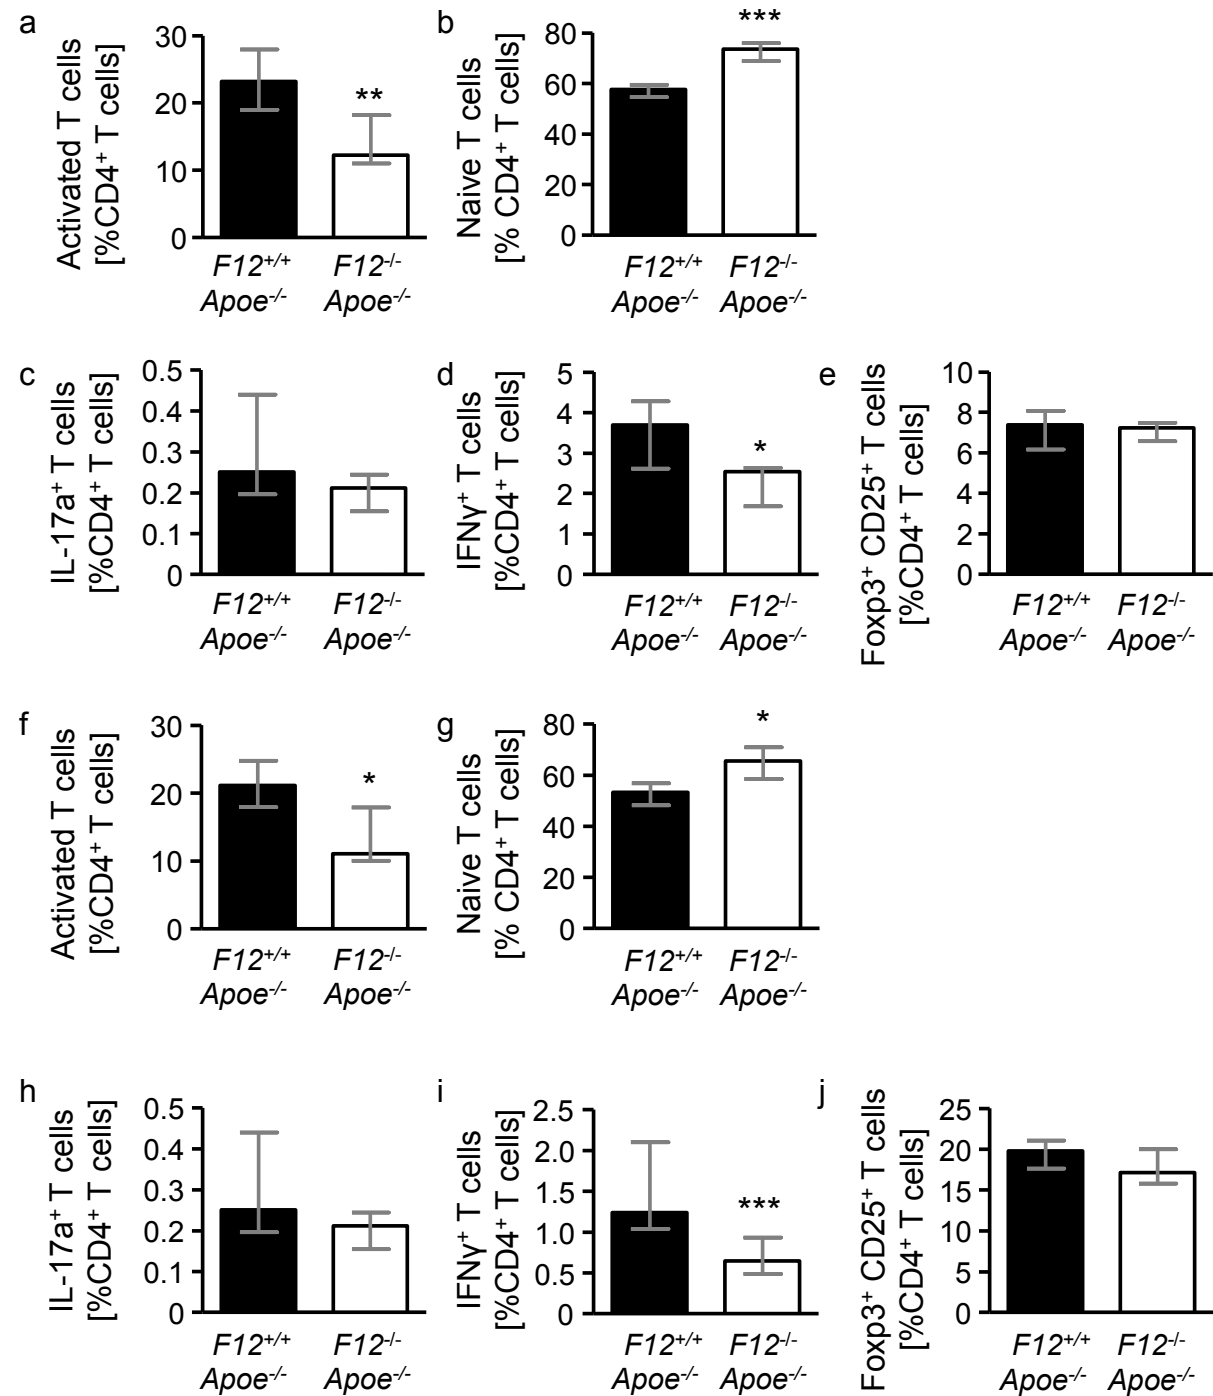

**Suppl. Figure 4: *Apoe<sup>-/-</sup>* mice deficient in FXII display diminished T cell activation.** Flow cytometric analyses of activated T cell distributions in blood (a-e) and lymph nodes (f-j) of atherosclerotic *F12<sup>+/+</sup> Apoe<sup>-/-</sup>* (n=10) and *F12<sup>-/-</sup> Apoe<sup>-/-</sup>* mice (n=6) fed a high fat diet for 12 weeks. Frequencies of, activated CD44<sup>high</sup> CD62L<sup>low</sup> (a,f) and naïve CD62L<sup>high</sup> CD44<sup>low</sup> CD4<sup>+</sup> T cells (b,g), IL-17a<sup>+</sup> CD4<sup>+</sup> T cells (c,h), IFN $\gamma$ <sup>+</sup> CD4<sup>+</sup> T cells (d,i), and of Foxp3<sup>+</sup>CD25<sup>+</sup> CD4<sup>+</sup> T cells (e,j) were quantitated. Bars represent median with interquartile ranges. \*p<0.05, \*\*p<0.01, \*\*\*p<0.001.

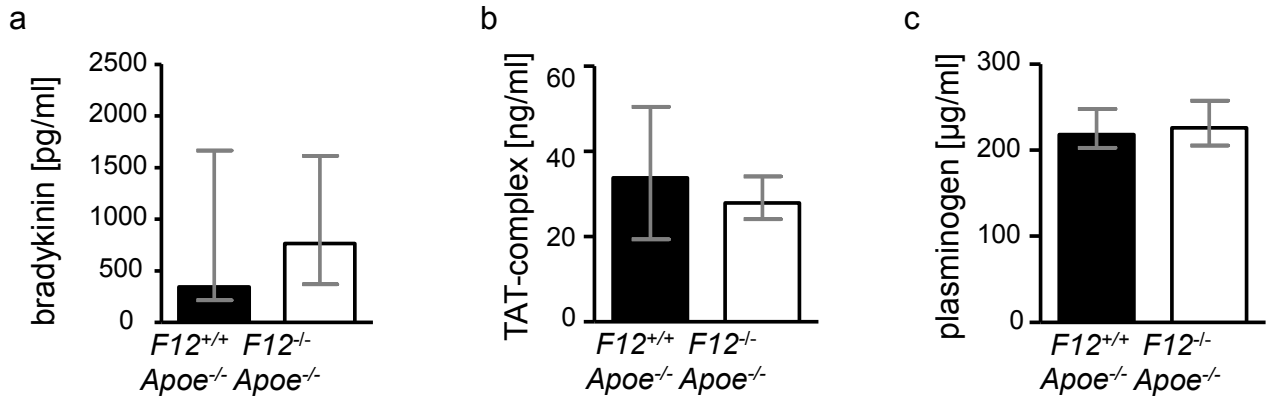

**Suppl. Figure 5: Deficiency of FXII in atherosclerotic *Apoe<sup>-/-</sup>* mice does not alter blood plasminogen, bradykinin, or TAT-complex levels.** Bradykinin (a), TAT-complex (b) and plasminogen (c) protein levels in serum or plasma of *F12<sup>+/+</sup>Apoe<sup>-/-</sup>* and *F12<sup>-/-</sup>Apoe<sup>-/-</sup>* mice after 12 weeks of high fat diet feeding, as quantified by ELISA (n=9-16 mice per group). Bars represent median with interquartile ranges.

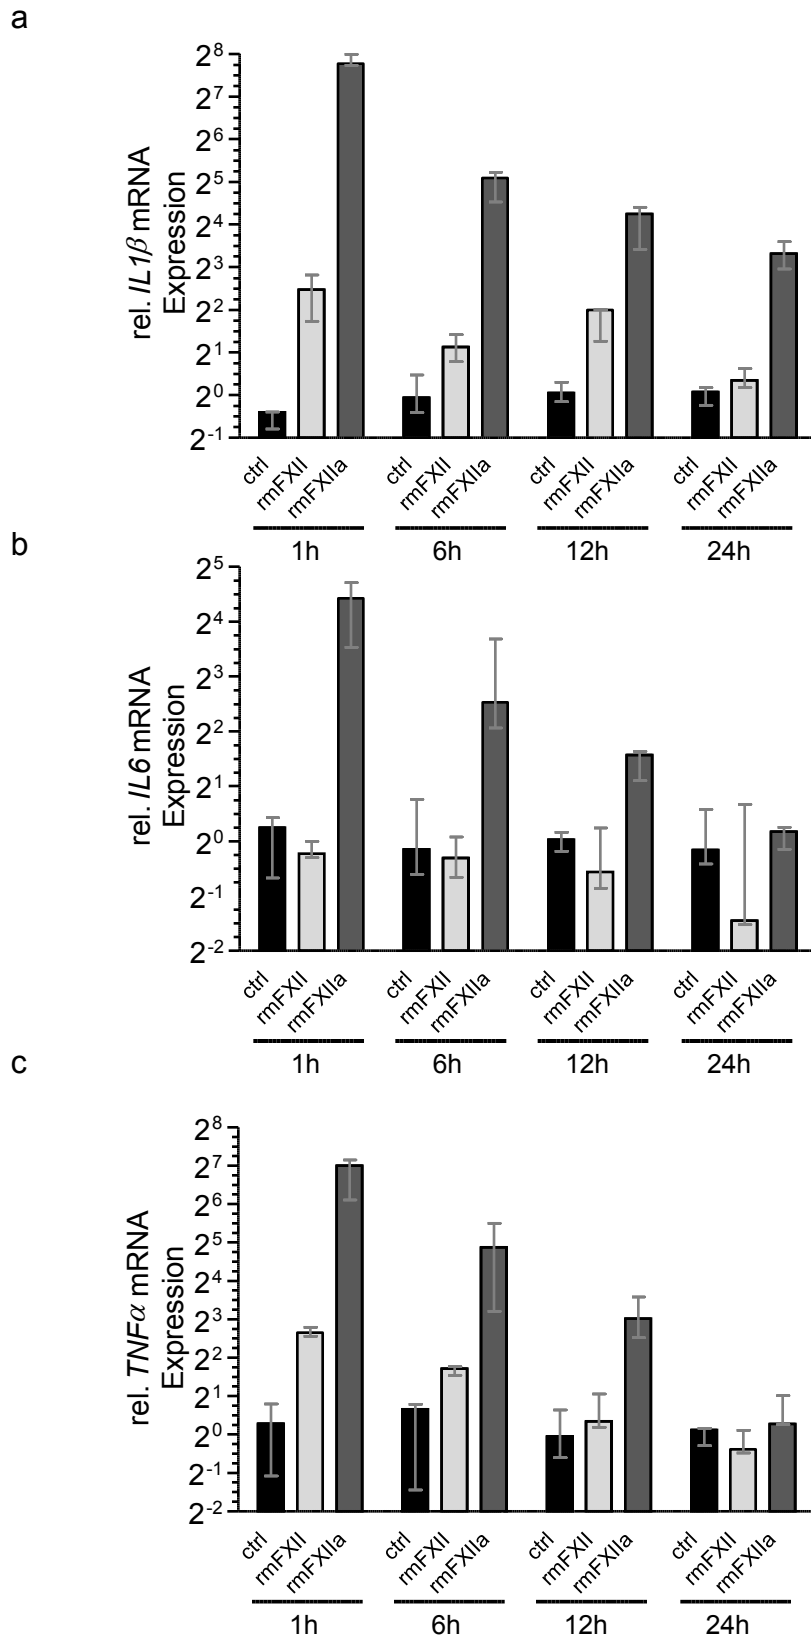

**Suppl. Figure 6: Time-dependent induction of cytokine mRNA expression after FXII or FXIIa stimulation in bone marrow-derived macrophages (BMDMs).** Cytokine mRNA expression was quantified by real-time PCR at 1, 6, 12 and 24h after 3 $\mu$ g/ml rmFXII or mFXIIa stimulation of BMDMs (n=3 mice). Data represent mean  $\pm$  SEM.

a

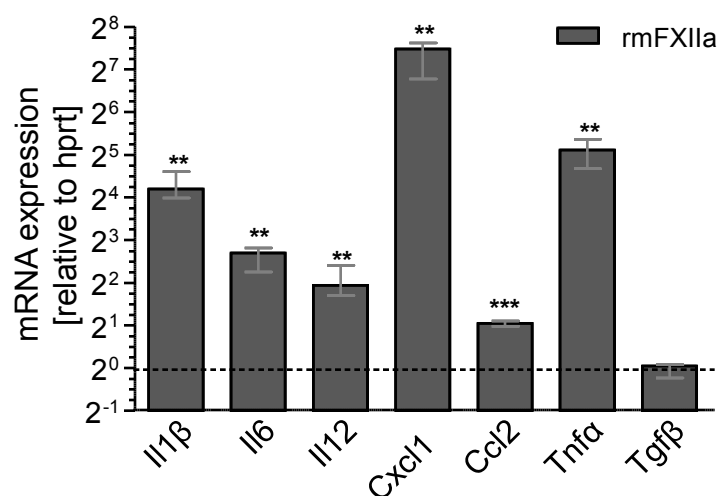

b

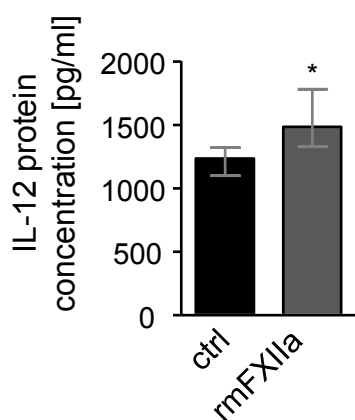

c

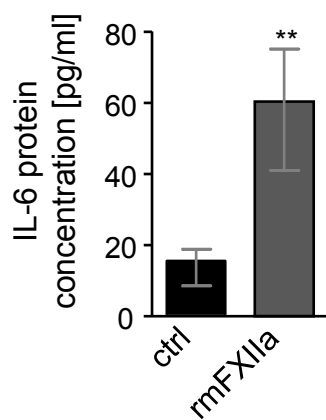

d

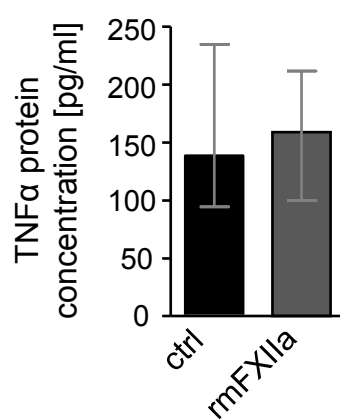

**Suppl. Figure 7: Stimulation of bone marrow-derived antigen presenting cells (BM-APCs) with rmFXIIa induces cytokine expression.** (a) Induction of cytokine mRNA expression was quantified in BM-APCs after 1h of stimulation with rmFXIIa (n=3 mice) by real time PCR. Protein secretion of (b) IL-12, (c) IL-6 and (d) TNF $\alpha$  into M-APC culture supernatants was quantified after treatment with FXII for 24h by ELISA (n=3). Bars represent median with interquartile ranges. \*p<0.05, \*\*p<0.01, \*\*\*p<0.001.

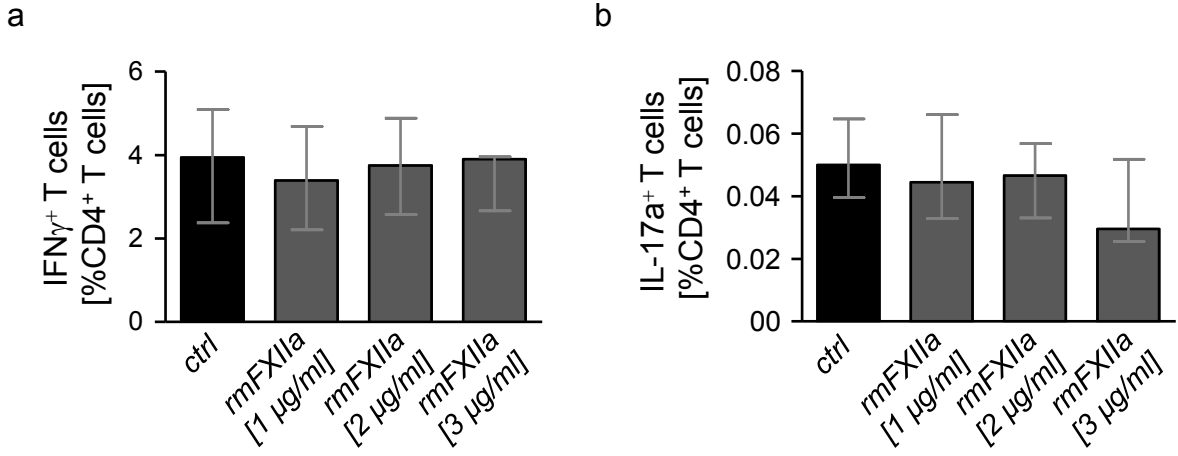

**Suppl. Figure 8: Activated FXII does not directly alter T cell polarization.** Anti-CD3/CD28 Ab activated naïve CD4<sup>+</sup> T cells from C57BL/6J mice stimulated for 3.5 days in the presence or absence of rmFXIIa at indicated concentrations; quantification of (a) IFN $\gamma$ <sup>+</sup> T cells and (b) IL-17a<sup>+</sup> T cells (n=4 independent experiments performed in triplicates). Bars represent median with interquartile ranges.

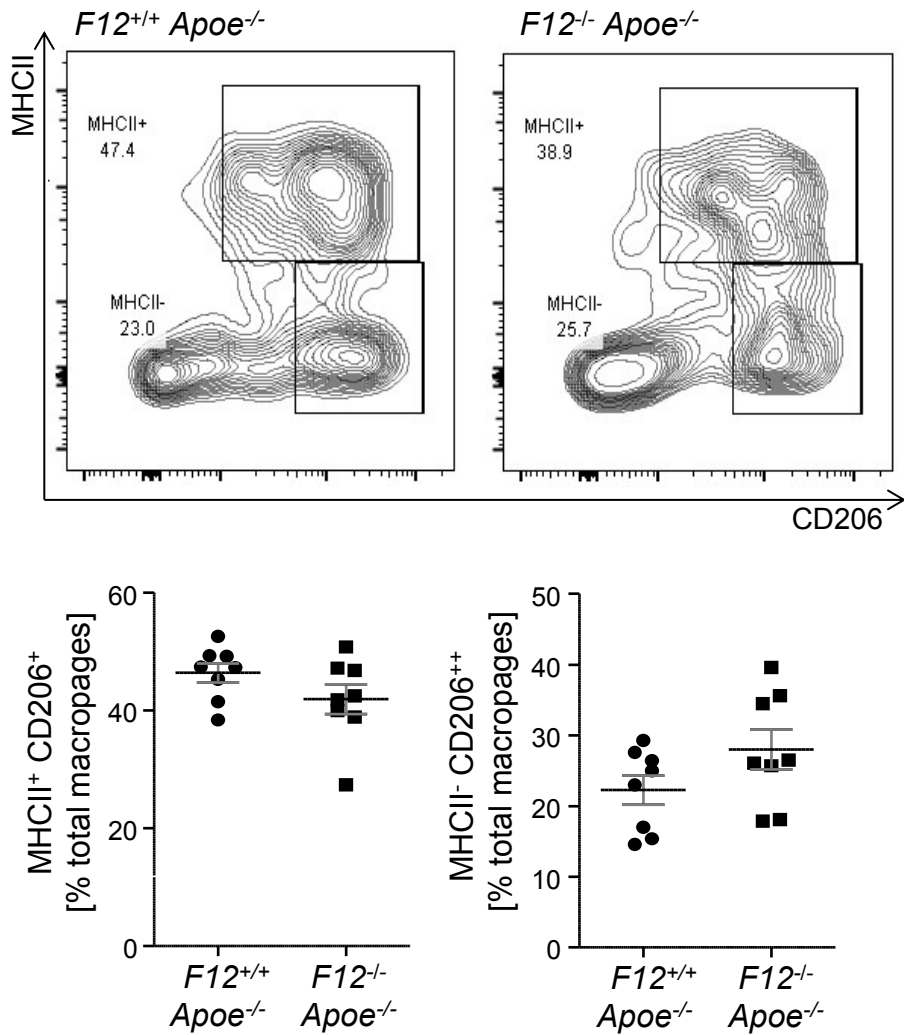

**Suppl. Figure 9: Analysis of lesional macrophage phenotype.** Flow cytometric analyses of frequencies of MHCII<sup>+</sup> CD206<sup>+</sup> M1 and MHCII<sup>-</sup> CD206<sup>++</sup> M2 macrophages among CD11b<sup>+</sup> F4/80<sup>+</sup> macrophages in the aorta of atherosclerotic  $F12^{+/+} Apoe^{-/-}$  and  $F12^{-/-} Apoe^{-/-}$  mice fed a high fat diet for 12 weeks. Representative contour plots are shown. Bars represent median with interquartile ranges.

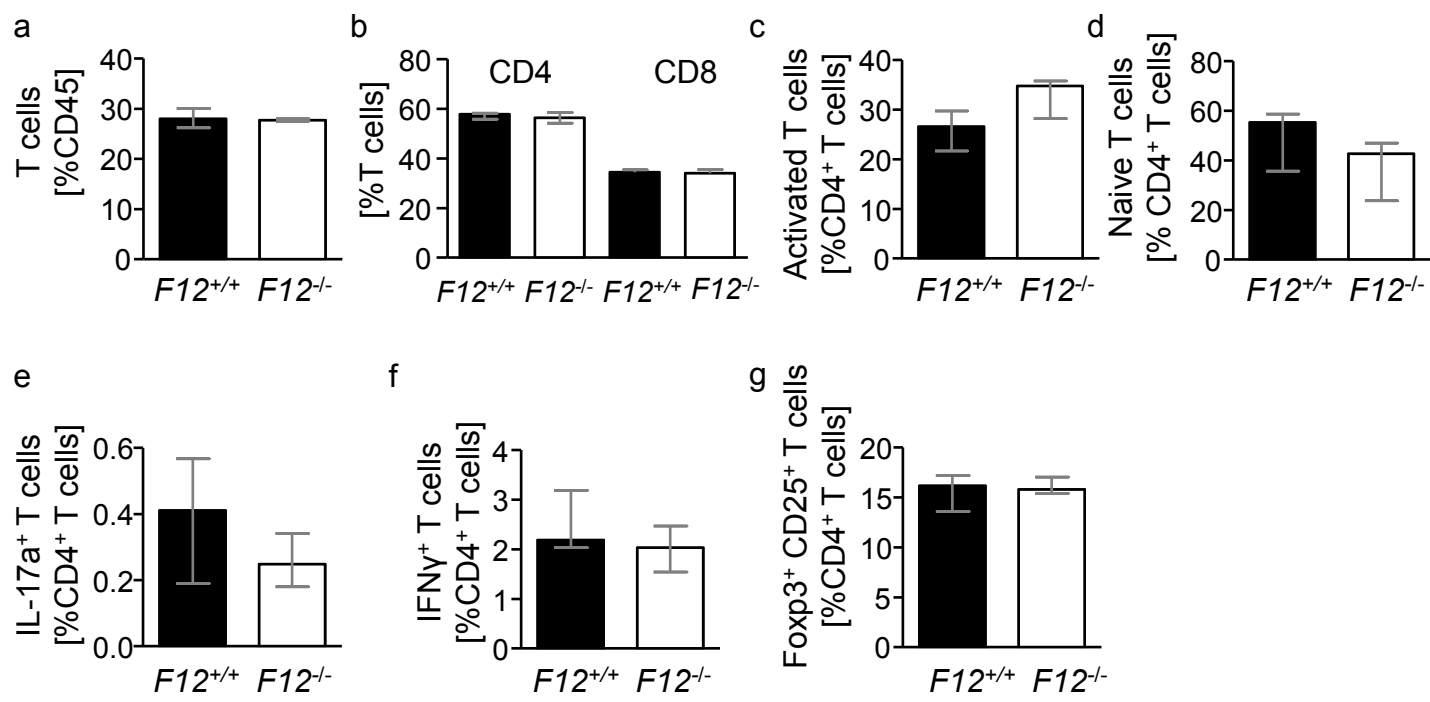

**Suppl. Figure 10: Deficiency of FXII does not alter T cell activation under homeostatic conditions.** Flow cytometric analyses of T cell distributions in spleens of *F12<sup>+/+</sup>* and *F12<sup>-/-</sup>* mice (n=5 each). Frequencies of CD3<sup>+</sup> T cells among CD45<sup>+</sup> cells (a), CD4<sup>+</sup> and CD8<sup>+</sup> T cells among CD3<sup>+</sup> T cells (b), memory effector CD44<sup>high</sup> CD62L<sup>low</sup> (c) and naïve CD62L<sup>high</sup> CD44<sup>low</sup> CD4<sup>+</sup> T cells (d), IFN $\gamma$ <sup>+</sup> and IL-17a<sup>+</sup> CD4<sup>+</sup> T cells (e, f) and of Foxp3<sup>+</sup>CD25<sup>+</sup> CD4<sup>+</sup> T cells (g). Bars represent median with interquartile ranges.

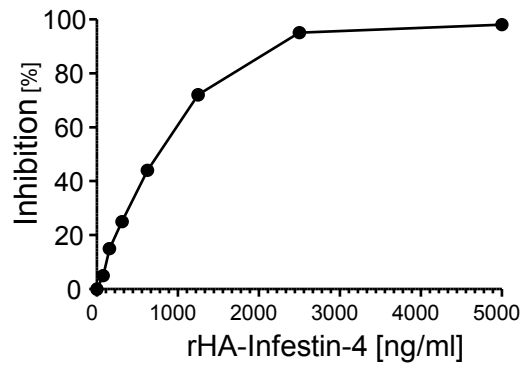

**Suppl. Figure 11: Inhibition of FXIIa proteolytic activity.** Inhibition of mFXIIa activity by rHA-Infestin-4 was determined at different inhibitor concentrations and quantified by conversion of a chromogenic substrate for FXIIa.
